# Supplementary material for: Unraveling the cryptic functions of mitogen-activated protein kinases Cpk2 and Mpk2 in Cryptococcus neoformans
Source: PubMed Central journal article supplement (PMC11253600; doi:10.1128/mbio.01156-24), 2024-06-14
Supplement: mbio.01156-24-s0001.pdf [file mbio.01156-24-s0001.pdf]

Jang et al. (Supplementary Figure 1)

A

**CPK2 WT allele**

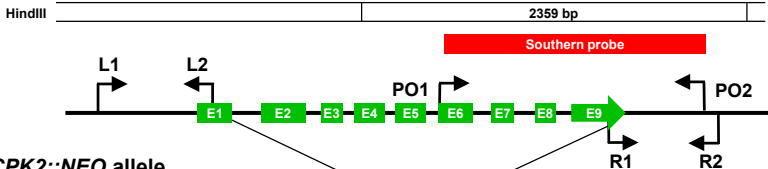

**CPK2::NEO allele**

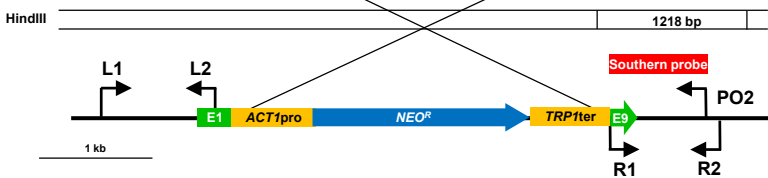

**MPK2 WT allele**

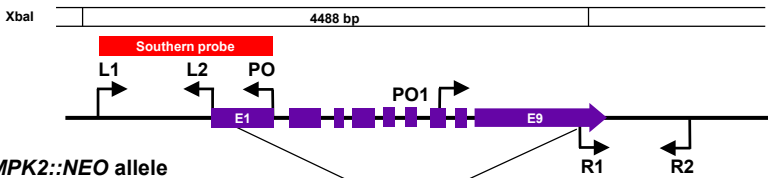

**MPK2::NEO allele**

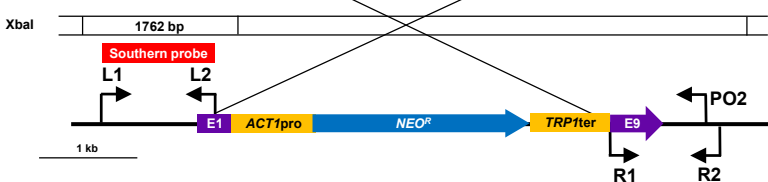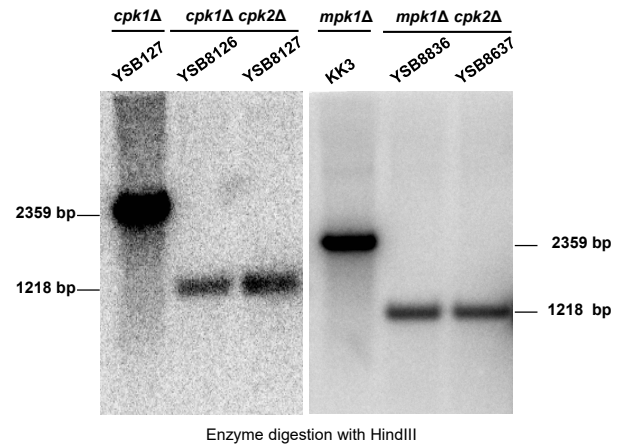

Enzyme digestion with HindIII

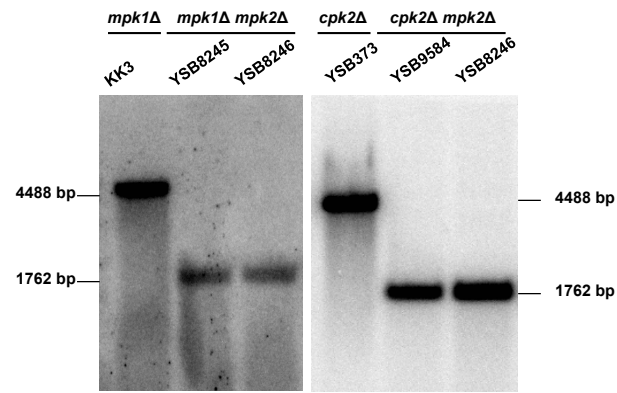

Enzyme digestion with XbaI

B

**CPK2 WT allele**

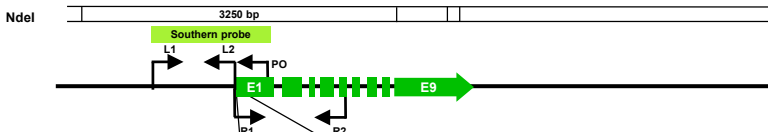

**P<sub>H3</sub>::CPK2 allele**

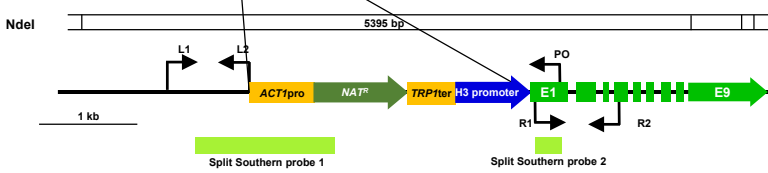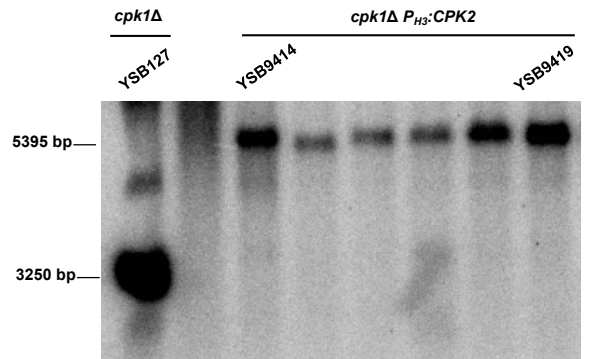

Enzyme digestion with NdeI

**MPK2 WT allele**

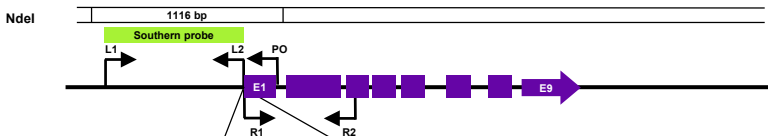

**P<sub>H3</sub>::MPK2 allele**

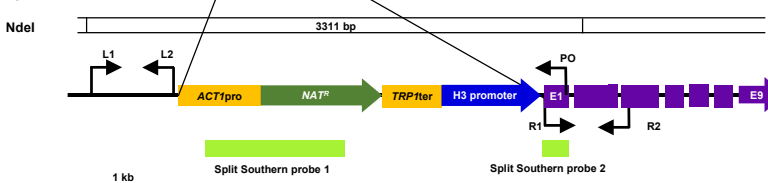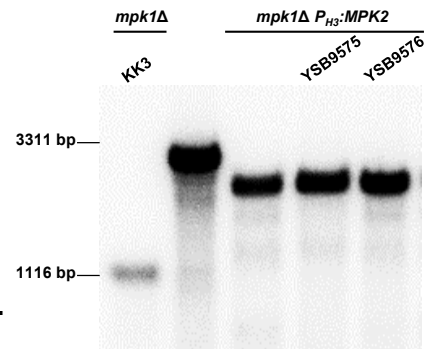

Enzyme digestion with NdeI

(continued)

Jang et al. (Supplementary Figure 1)

C

**MAT2 WT allele**

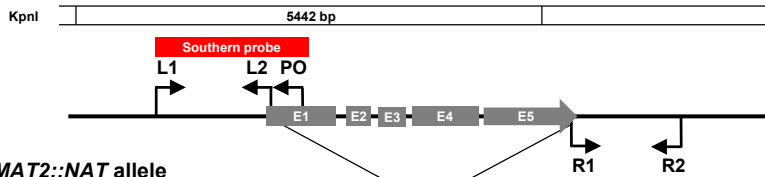

**MAT2::NAT allele**

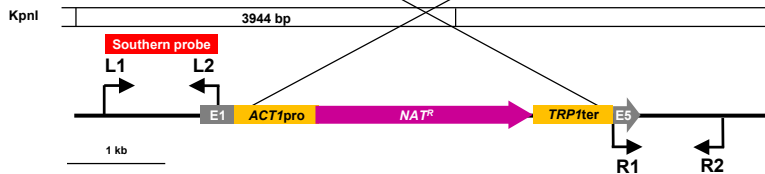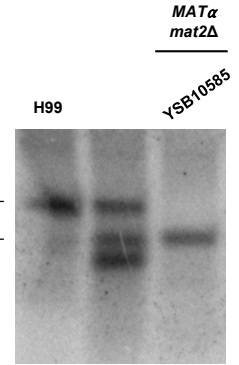

**MAT2 WT allele**

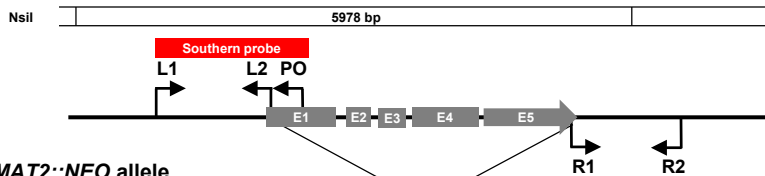

**MAT2::NEO allele**

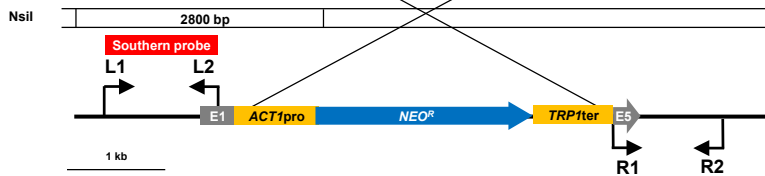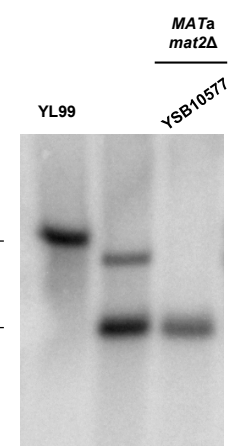

**MAT2 WT allele**

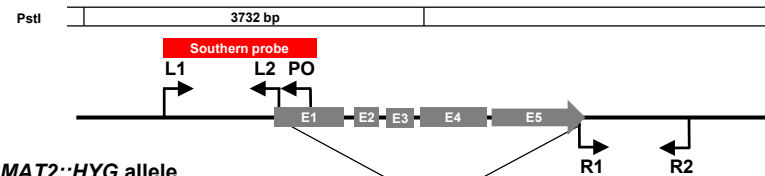

**MAT2::HYG allele**

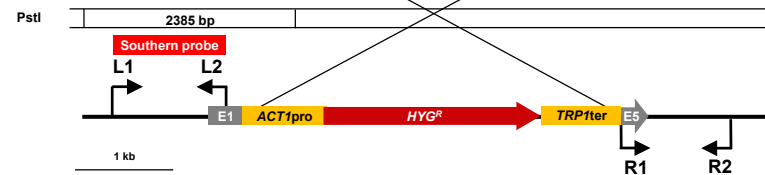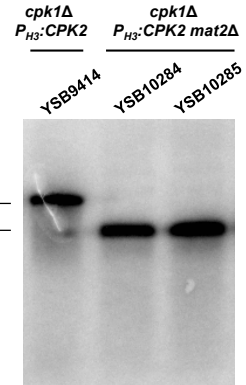

(continued)

## Jang et al. (Supplementary Figure 1)

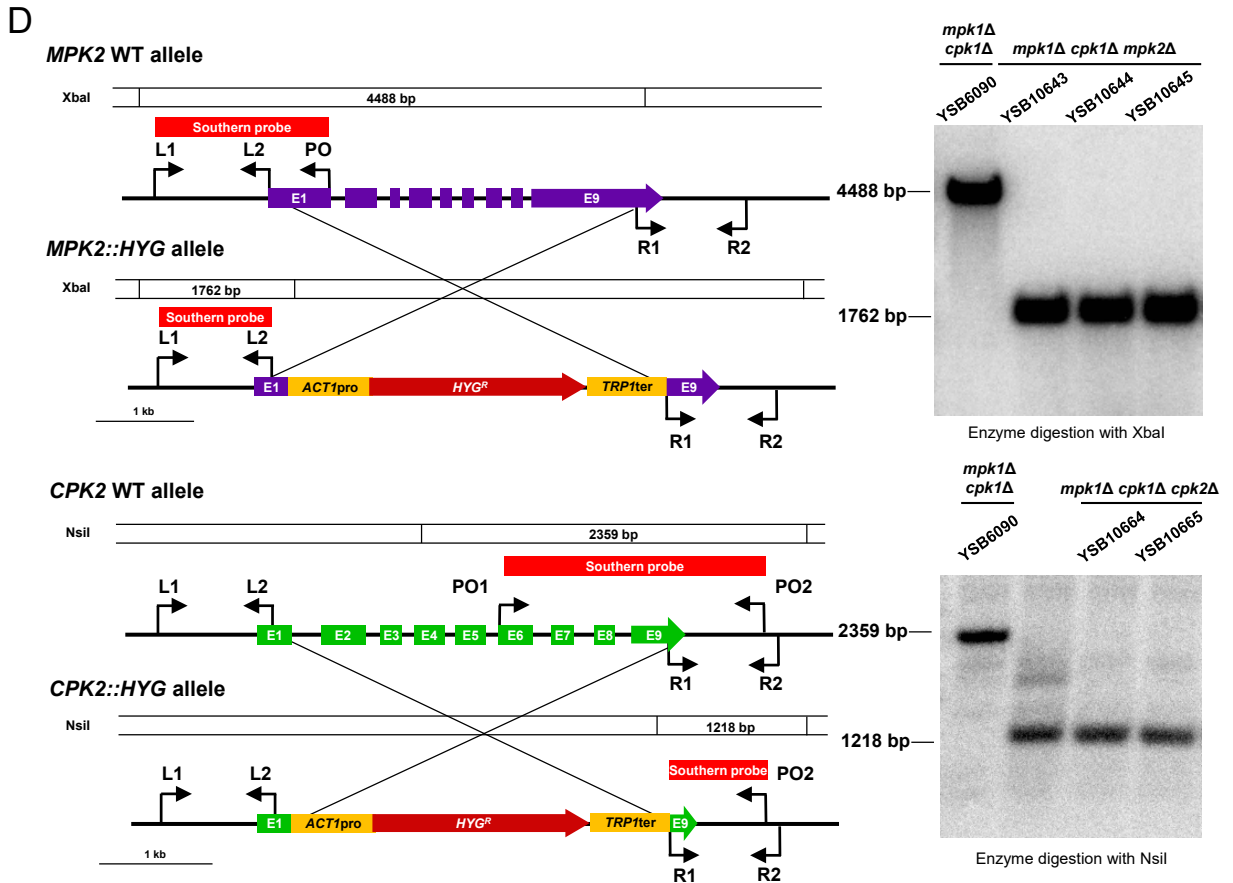

**Figure S1. Construction of mutant strains were established through Southern blot analysis.** The target MAPK genes were replaced with neomycin or hygromycin resistance genes (*NEO<sup>R</sup>* or *HYG<sup>R</sup>*), and the genes were delivered using the gene gun biolistic transformation method (see Material and Method). Graphical representations depict the strategies for homologous recombination between the wild-type gene and the deletion cassette. The newly constructed strains were verified through diagnostic PCR and further validated by Southern blot using dCTP labeled with the radioactive phosphorus P<sup>32</sup>. The primer sets used for these procedures are detailed in Table S2.
