# Supplementary material for: Unraveling the cryptic functions of mitogen-activated protein kinases Cpk2 and Mpk2 in Cryptococcus neoformans
Source: PubMed Central journal article supplement (PMC11253600; doi:10.1128/mbio.01156-24), 2024-06-14
Supplement: mbio.01156-24-s0002.pdf [file mbio.01156-24-s0002.pdf]

## Jang et al. (Supplementary Figure 2)

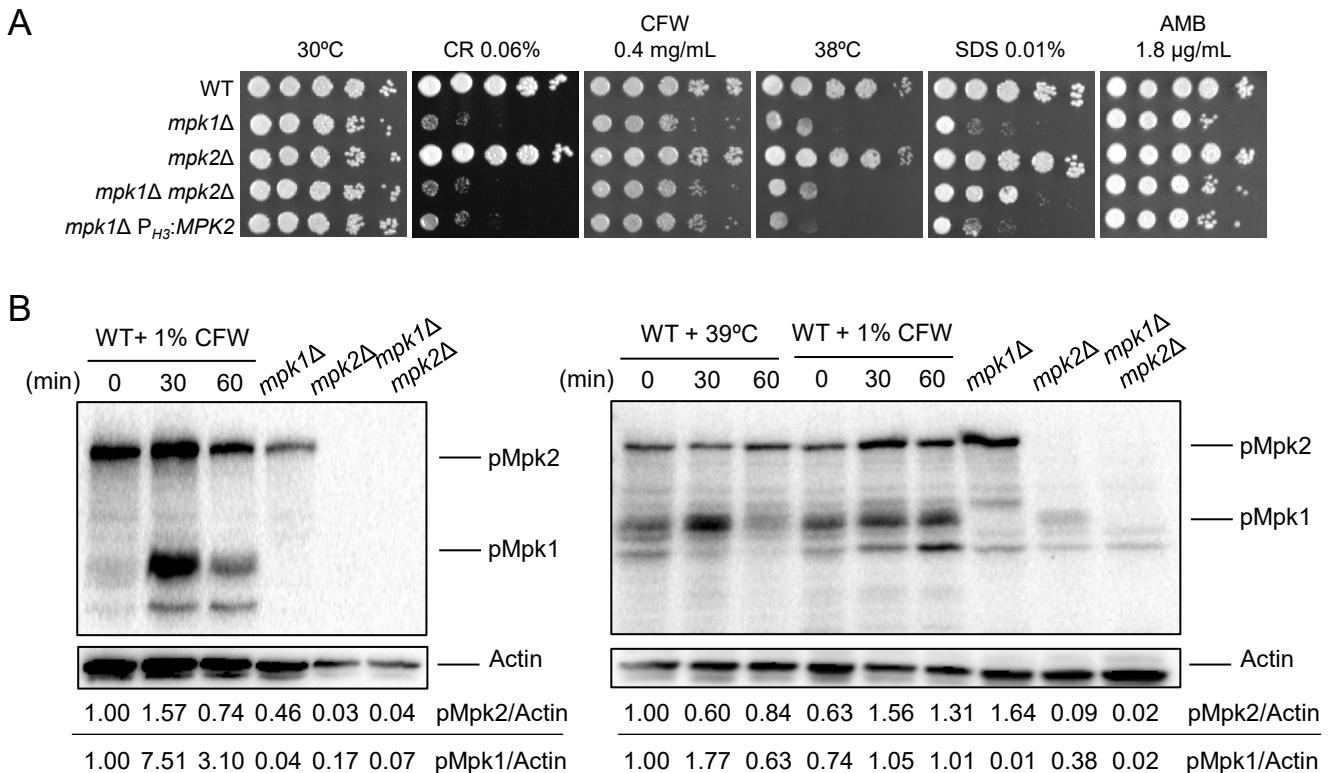

**Figure S2. Cell wall stress phosphorylates Mpk1 and Mpk2, with Mpk2's overexpression able to partially compensate for *mpk1Δ*.** A) Wild-type, *mpk1Δ*, *mpk2Δ*, *mpk1Δ mpk2Δ* (YSB8246), and *mpk1Δ P<sub>H3</sub>:MPK2* (YSB9576) were cultured and added 0.06% CR, 0.4 mg/mL CFW, 5  $\mu$ g/mL FCZ, at 38°C, 0.01% SDS, and 1.8  $\mu$ g/mL AMB, then repeated the spotting experiments. The used *mpk1Δ mpk2Δ* and *mpk1Δ P<sub>H3</sub>:MPK2* are independent additional strains from Fig. 3C. (B) After exposing wild-type strains to 39°C or 1% CFW for 0, 30, and 60 minutes, the phosphorylation of Mpk1 and Mpk2 was assessed. Phosphorylation of both Mpk1 and Mpk2 was detected simultaneously using an anti phospho-p42/44 antibody (Cell Signaling, #4370), and *mpk1Δ*, *mpk2Δ*, and *mpk1Δ mpk2Δ* were used as controls to confirm the identity of each protein band. Actin was used as the loading control.
