# Supplementary material for: Unraveling the cryptic functions of mitogen-activated protein kinases Cpk2 and Mpk2 in Cryptococcus neoformans
Source: PubMed Central journal article supplement (PMC11253600; doi:10.1128/mbio.01156-24), 2024-06-14
Supplement: mbio.01156-24-s0004.pdf [file mbio.01156-24-s0004.pdf]

Jang et al. (Supplementary Figure 4)

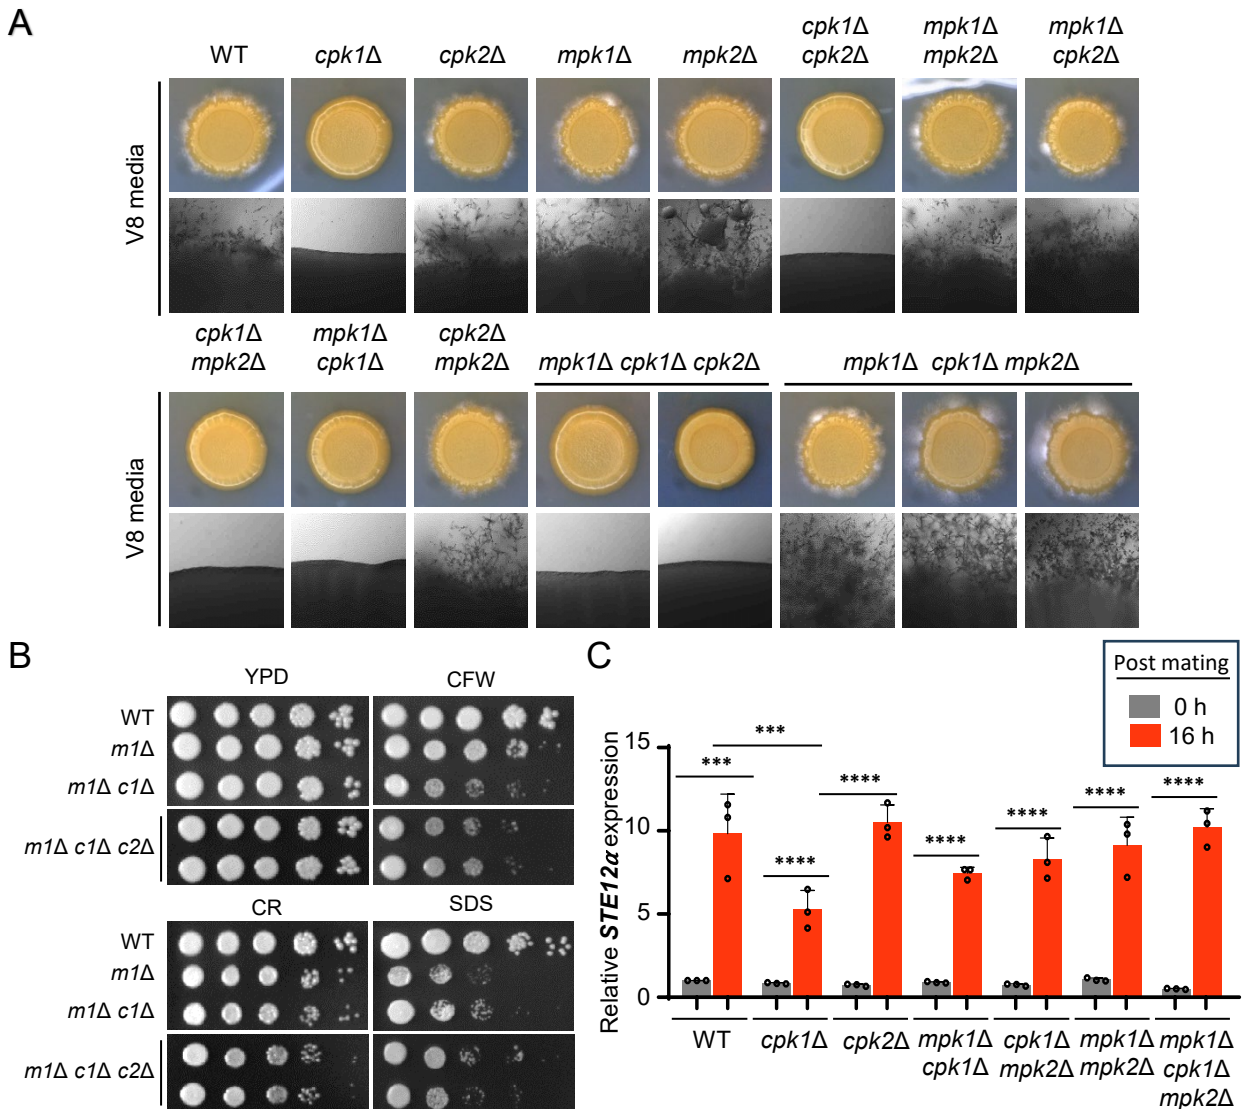

**Figure. S4. The MAPKs are intricately involved in mating, regulating the Cpk1 MAPK pathway.** (A) The filamentation of the MAPK mutants presented above was reconfirmed in V8 media. For *mpk1Δ cpk1Δ cpk2Δ*, two independent strains were used, and for *mpk1Δ cpk1Δ mpk2Δ*, three independent strains were utilized, all yielding consistent results. (B) Wild-type, *mpk1Δ*, *mpk1Δ cpk1Δ*, and two independent *mpk1Δ cpk1Δ cpk2Δ* strains were subjected to spot assays under cell wall and cell membrane stress conditions of 0.05% CR, 0.5 mg/ml CFW, and 0.01% SDS. (C) Under the same conditions as in figures C and E, the expression levels of *STE12α* in the wild-type and each MAPK mutant were measured. The statistical importance of the results was ascertained by conducting a one-way ANOVA followed by Tukey's test for multiple comparisons. The levels of significance were denoted as follows: '\*\*\*' for *P* values less than 0.001, '\*\*\*\*' for less than 0.0001, and 'NS' indicating a lack of statistical significance.
