# Supplementary material for: Unraveling the cryptic functions of mitogen-activated protein kinases Cpk2 and Mpk2 in Cryptococcus neoformans
Source: PubMed Central journal article supplement (PMC11253600; doi:10.1128/mbio.01156-24), 2024-06-14
Supplement: mbio.01156-24-s0005.pdf [file mbio.01156-24-s0005.pdf]

**Supplementary Table 1. List of strains used in this study.**

| <b>Strain</b> | <b>Genotype</b>                                                                                                      | <b>Parent</b> | <b>Reference</b> |
|---------------|----------------------------------------------------------------------------------------------------------------------|---------------|------------------|
| H99           | <i>MAT<math>\alpha</math></i>                                                                                        |               | (1)              |
| YL99          | <i>MAT<math>\alpha</math></i>                                                                                        |               | (2)              |
| YSB127        | <i>MAT<math>\alpha</math> cpk1<math>\Delta</math>::NAT-STM #184</i>                                                  | H99           | (3)              |
| YSB373        | <i>MAT<math>\alpha</math> cpk2<math>\Delta</math>::NAT-STM #122</i>                                                  | H99           | (3)              |
| YSB264        | <i>MAT<math>\alpha</math> ssk2<math>\Delta</math>::NAT-STM #210</i>                                                  | H99           | (4)              |
| YSB273        | <i>MAT<math>\alpha</math> bck1<math>\Delta</math>::NAT-STM #43</i>                                                   | H99           | (5)              |
| YSB313        | <i>MAT<math>\alpha</math> ste11<math>\Delta</math>::NAT-STM #242</i>                                                 | H99           | (4)              |
| YSB330        | <i>MAT<math>\alpha</math> mkk2<math>\Delta</math>::NAT-STM #224</i>                                                  | H99           | (5)              |
| YSB8126       | <i>MAT<math>\alpha</math> cpk1<math>\Delta</math>::NAT cpk2<math>\Delta</math>::NEO</i>                              | YSB127        | This study       |
| YSB8127       | <i>MAT<math>\alpha</math> cpk1<math>\Delta</math>::NAT cpk2<math>\Delta</math>::NEO</i>                              | YSB127        | This study       |
| YSB9414       | <i>MAT<math>\alpha</math> cpk1<math>\Delta</math>::NAT P<sub>H3</sub>:CPK2::NEO</i>                                  | YSB127        | This study       |
| YSB9419       | <i>MAT<math>\alpha</math> cpk1<math>\Delta</math>::NAT P<sub>H3</sub>:CPK2::NEO</i>                                  | YSB127        | This study       |
| KK3           | <i>MAT<math>\alpha</math> mpk1<math>\Delta</math>::NAT -STM #150</i>                                                 | H99           | (5)              |
| YSB3236       | <i>MAT<math>\alpha</math> mpk2<math>\Delta</math>::NAT -STM #102</i>                                                 | H99           | (3)              |
| YSB8245       | <i>MAT<math>\alpha</math> mpk1<math>\Delta</math>::NAT mpk2<math>\Delta</math>::NEO</i>                              | KK3           | This study       |
| YSB8246       | <i>MAT<math>\alpha</math> mpk1<math>\Delta</math>::NAT mpk2<math>\Delta</math>::NEO</i>                              | KK3           | This study       |
| YSB9575       | <i>MAT<math>\alpha</math> mpk1<math>\Delta</math>::NAT P<sub>H3</sub>:MPK2::NEO</i>                                  | KK3           | This study       |
| YSB9576       | <i>MAT<math>\alpha</math> mpk1<math>\Delta</math>::NAT P<sub>H3</sub>:MPK2::NEO</i>                                  | KK3           | This study       |
| YSB8636       | <i>MAT<math>\alpha</math> mpk1<math>\Delta</math>::NAT cpk2<math>\Delta</math>::NEO</i>                              | KK3           | This study       |
| YSB8637       | <i>MAT<math>\alpha</math> mpk1<math>\Delta</math>::NAT cpk2<math>\Delta</math>::NEO</i>                              | KK3           | This study       |
| YSB9206       | <i>MAT<math>\alpha</math> cpk1<math>\Delta</math>::NAT mpk2<math>\Delta</math>::NEO</i>                              | YSB127        | This study       |
| YSB9207       | <i>MAT<math>\alpha</math> cpk1<math>\Delta</math>::NAT mpk2<math>\Delta</math>::NEO</i>                              | YSB127        | This study       |
| YSB9584       | <i>MAT<math>\alpha</math> cpk2<math>\Delta</math>::NAT mpk2<math>\Delta</math>::NEO</i>                              | YSB373        | This study       |
| YSB9585       | <i>MAT<math>\alpha</math> cpk2<math>\Delta</math>::NAT mpk2<math>\Delta</math>::NEO</i>                              | YSB373        | This study       |
| YSB6090       | <i>MAT<math>\alpha</math> mpk1<math>\Delta</math>::NAT cpk1<math>\Delta</math>::NEO</i>                              | YSB3814       | (6)              |
| YSB10643      | <i>MAT<math>\alpha</math> mpk1<math>\Delta</math>::NAT cpk1<math>\Delta</math>::NEO mpk2<math>\Delta</math>::HYG</i> | YSB6090       | This study       |
| YSB10644      | <i>MAT<math>\alpha</math> mpk1<math>\Delta</math>::NAT cpk1<math>\Delta</math>::NEO mpk2<math>\Delta</math>::HYG</i> | YSB6090       | This study       |
| YSB10645      | <i>MAT<math>\alpha</math> mpk1<math>\Delta</math>::NAT cpk1<math>\Delta</math>::NEO mpk2<math>\Delta</math>::HYG</i> | YSB6090       | This study       |
| YSB10664      | <i>MAT<math>\alpha</math> mpk1<math>\Delta</math>::NAT cpk1<math>\Delta</math>::NEO cpk2<math>\Delta</math>::HYG</i> | YSB6090       | This study       |
| YSB10665      | <i>MAT<math>\alpha</math> mpk1<math>\Delta</math>::NAT cpk1<math>\Delta</math>::NEO cpk2<math>\Delta</math>::HYG</i> | YSB6090       | This study       |
| YSB10577      | <i>MAT<math>\alpha</math> mat2<math>\Delta</math>::NEO</i>                                                           | YL99          | This study       |
| YSB10585      | <i>MAT<math>\alpha</math> mat2<math>\Delta</math>::NAT-STM #210</i>                                                  | H99           | This study       |
| YSB10284      | <i>MAT<math>\alpha</math> cpk1<math>\Delta</math>::NAT P<sub>H3</sub>:CPK2::NEO mat2<math>\Delta</math>::HYG</i>     | YSB9414       | This study       |
| YSB10285      | <i>MAT<math>\alpha</math> cpk1<math>\Delta</math>::NAT P<sub>H3</sub>:CPK2::NEO mat2<math>\Delta</math>::HYG</i>     | YSB9414       | This study       |

1. Perfect JR, Ketabchi N, Cox GM, Ingram CW, Beiser CL. 1993. Karyotyping of *Cryptococcus neoformans* as an epidemiological tool. *J Clin Microbiol* 31:3305-9.
2. Semighini CP, Averette AF, Perfect JR, Heitman J. 2011. Deletion of *Cryptococcus neoformans* AIF ortholog promotes chromosome aneuploidy and fluconazole-resistance in a metacaspase-independent manner. *PLoS Pathog* 7:e1002364.
3. Lee KT, So YS, Yang DH, Jung KW, Choi J, Lee DG, Kwon H, Jang J, Wang LL, Cha S, Meyers GL, Jeong E, Jin JH, Lee Y, Hong J, Bang S, Ji JH, Park G, Byun HJ, Park SW, Park YM, Adedoyin G, Kim T, Averette AF, Choi JS, Heitman J, Cheong E, Lee YH, Bahn YS. 2016. Systematic functional analysis of kinases in the fungal pathogen *Cryptococcus neoformans*. *Nat Commun* 7:12766.
4. Bahn YS, Geunes-Boyer S, Heitman J. 2007. Ssk2 mitogen-activated protein kinase kinase governs divergent patterns of the stress-activated Hog1 signaling pathway in *Cryptococcus neoformans*. *Eukaryot Cell* 6:2278-89.
5. Kojima K, Bahn YS, Heitman J. 2006. Calcineurin, Mpk1 and Hog1 MAPK pathways independently control fludioxonil antifungal sensitivity in *Cryptococcus neoformans*. *Microbiology (Reading)* 152:591-604.
6. So YS, Jang J, Park G, Xu J, Olszewski MA, Bahn YS. 2018. Sho1 and Msb2 Play Complementary but Distinct Roles in Stress Responses, Sexual Differentiation, and Pathogenicity of *Cryptococcus neoformans*. *Front Microbiol* 9:2958.
