# Supplementary material for: Unraveling the cryptic functions of mitogen-activated protein kinases Cpk2 and Mpk2 in Cryptococcus neoformans
Source: PubMed Central journal article supplement (PMC11253600; doi:10.1128/mbio.01156-24), 2024-06-14
Supplement: mbio.01156-24-s0006.pdf [file mbio.01156-24-s0006.pdf]

**Supplementary Table 2. List of primers used in this study.**

| <b>Primer Name</b> | <b>Sequence (5' to 3')</b>                   | <b>Comments</b>                               |
|--------------------|----------------------------------------------|-----------------------------------------------|
| <b>B79</b>         | TGTGGATGCTGGCGGAGGATA                        | Screening primer                              |
| <b>B1026</b>       | GTAAAACGACGGCCAGTGAAT                        | M13 forward universal primer                  |
| <b>B1027</b>       | CAGGAAACAGCTATGACCATG                        | M13 reverse universal primer                  |
| <b>B1454</b>       | AAGGTGTTCCCCGACGACGAATCG                     | <i>NAT</i> PCR primer SM1                     |
| <b>B1455</b>       | AACTCCGTCGCGAGCCCCATCAAC                     | <i>NAT</i> PCR primer SM2                     |
| <b>B1886</b>       | TGGAAGAGATGGATGTGC                           | <i>NEO</i> PCR primer SM1                     |
| <b>B1887</b>       | ATTGTCTGTTGTGCCAG                            | <i>NEO</i> PCR primer SM2                     |
| <b>B5751</b>       | CGAAGAATCTCGTGCTTTC                          | <i>HYG</i> PCR primer SM1                     |
| <b>B5752</b>       | ATTGACCGATTCTTGC                             | <i>HYG</i> PCR primer SM2                     |
| <b>B20938</b>      | CGTTGTAGACATGTTGGTATGCT                      | <i>CPK1</i> knockout primer L1                |
| <b>B20939</b>      | TCACTGGCCGTCGTTTTACGTCATGCTGCCA<br>CTTTGCTA  | <i>CPK1</i> knockout primer L2                |
| <b>B20940</b>      | CATGGTCATAGCTGTTTCTGCCAGTACCCA<br>CCATCCTCTC | <i>CPK1</i> knockout primer R1                |
| <b>B20941</b>      | GATGGTGGGGTAGGAAGGAC                         | <i>CPK1</i> knockout primer R2                |
| <b>B20942</b>      | CCAGATTGTCCAGCTGCAAG                         | <i>CPK1</i> screening primer SO               |
| <b>B20943</b>      | TGGTATGGTCAAAAGGCGTG                         | <i>CPK1</i> Southern blot probe primer<br>PO  |
| <b>B20944</b>      | CTGGTACGCATCTTCCCTCT                         | <i>CPK1</i> internal screening primer<br>iLP  |
| <b>B20945</b>      | GGAATGCTGCTCACCGTTAG                         | <i>CPK1</i> internal screening primer<br>iRP  |
| <b>B8557</b>       | CTGCGATTTCCGCTCTTGCC                         | <i>CPK1</i> qRT primer qLP                    |
| <b>B8558</b>       | GATACCACCTGTAGCGAC                           | <i>CPK1</i> qRT primer qRP                    |
| <b>JOHE12031</b>   | ATGTGCTTGGTTTGCCCGAG                         | <i>CPK2</i> knockout primer L1                |
| <b>JOHE12032</b>   | CTGGCCGTCGTTTTACAACCTGACTTTGCGA<br>GGAGC     | <i>CPK2</i> knockout primer L2                |
| <b>JOHE12033</b>   | GTCATAGCTGTTTCTGGGAAGAGTTGAAG<br>AGGCTG      | <i>CPK2</i> knockout primer R1                |
| <b>JOHE12034</b>   | ACTGTGGCTGTTGTTCAAGC                         | <i>CPK2</i> knockout primer R2                |
| <b>JOHE12035</b>   | CCAAGGGAAGTCTACCAATAC                        | <i>CPK2</i> screening primer SO               |
| <b>JOHE12037</b>   | GGGAAAGATTAGTGCGTC                           | <i>CPK2</i> Southern blot probe primer<br>PO1 |
| <b>JOHE12038</b>   | GTGCGTAGATGAACGAGTG                          | <i>CPK2</i> Southern blot probe primer<br>PO2 |
| <b>B18149</b>      | CGGAGGAGGGTGTAGTGAG                          | <i>CPK2</i> internal screening primer<br>iLP  |
| <b>B18150</b>      | GCGAGTTGGTTGTGGCTAAA                         | <i>CPK2</i> internal screening primer<br>iRP  |
| <b>B8555</b>       | CCATCAGGTAGCAAAGTAGC                         | <i>CPK2</i> qRT primer qLP                    |
| <b>B8556</b>       | CAAAGTACTTCAACAGCTT                          | <i>CPK2</i> qRT primer qRP                    |
| <b>B14551</b>      | GATGGAGCAGAGGCGTGTAG                         | <i>CPK2</i> overexpression PCR<br>primer L1   |

|               |                                                |                                                             |
|---------------|------------------------------------------------|-------------------------------------------------------------|
| <b>B14552</b> | CACTCGAATCCTGCATGCGATAGGATGGGA<br>AACGGA       | <i>CPK2</i> overexpression PCR<br>primer L2                 |
| <b>B14553</b> | CCACAACACATCTATCACATGTCAACGTCC<br>ACTTGC       | <i>CPK2</i> overexpression PCR<br>primer R1                 |
| <b>B14554</b> | ACGCGATGAAGGTCTGTTC                            | <i>CPK2</i> overexpression PCR<br>primer R2                 |
| <b>B14555</b> | GATGGGTTTGACTGCTGGTT                           | <i>CPK2</i> overexpression screening<br>primer SO           |
| <b>B14556</b> | ATGTGGAAAAGGTGGGACAG                           | <i>CPK2</i> overexpression Southern<br>blot probe primer PO |
| <b>B2470</b>  | ATGGCAGCAAGCGTAACTC                            | <i>MPK2</i> knockout PCR primer L1                          |
| <b>B2471</b>  | TCACTGGCCGTCGTTTTACGTTTTATGCCCG<br>TTGTGTTG    | <i>MPK2</i> knockout PCR primer L2                          |
| <b>B2472</b>  | CATGGTCATAGCTGTTTCCTGCCCAAAGTCA<br>GTCTGGTAACC | <i>MPK2</i> knockout PCR primer R1                          |
| <b>B2473</b>  | ATACATCTTCGTAGCCCCG                            | <i>MPK2</i> knockout PCR primer R2                          |
| <b>B2474</b>  | TCCAAATAGACCAAGCCC                             | <i>MPK2</i> screening primer SO                             |
| <b>B2475</b>  | CGTTGAGTGTTTGGTAGCC                            | <i>MPK2</i> Southern blot probe<br>primer PO                |
| <b>B18151</b> | AGACGGGAGCGAGTAAGATG                           | <i>MPK2</i> internal primer iLP                             |
| <b>B18152</b> | CAGCAACTCGGCCAGAATAC                           | <i>MPK2</i> internal primer iRP                             |
| <b>B9412</b>  | GACAGCAAATCCCTACACG                            | <i>MPK2</i> qRT primer qLP                                  |
| <b>B15176</b> | CGTACGAGGAGCGGAACC                             | <i>MPK2</i> qRT primer qLP                                  |
| <b>B14557</b> | GTGGAAGTGGACGACTCAGG                           | <i>MPK2</i> overexpression PCR<br>primer L1                 |
| <b>B14558</b> | CACTCGAATCCTGCATGCTCCGTAGAGTG<br>GGACAA        | <i>MPK2</i> overexpression PCR<br>primer L2                 |
| <b>B14559</b> | CCACAACACATCTATCACATGACGAGCCCT<br>TCAACT       | <i>MPK2</i> overexpression PCR<br>primer R1                 |
| <b>B14560</b> | TCTCTCTCAACGCCCTTCTC                           | <i>MPK2</i> overexpression PCR<br>primer R2                 |
| <b>B14561</b> | TGTTGAAGAAGACGGTCGTG                           | <i>MPK2</i> overexpression PCR<br>primer SO                 |
| <b>B14228</b> | TGAAGCATGATGAGCCTGTC                           | <i>MAT2</i> knockout PCR primer L1                          |
| <b>B14229</b> | TCACTGGCCGTCGTTTTACAGGGGTGAGAC<br>ATCAAATCG    | <i>MAT2</i> knockout PCR primer L2                          |
| <b>B14230</b> | CATGGTCATAGCTGTTTCCTGCAACAAATCC<br>TTCGGGCTTA  | <i>MAT2</i> knockout PCR primer R1                          |
| <b>B14231</b> | CAAGGAAGCTTTGGACGACT                           | <i>MAT2</i> knockout PCR primer R2                          |
| <b>B14232</b> | GCAGCTTACGGTCTGTTTCC                           | <i>MAT2</i> screening primer SO                             |
| <b>B14233</b> | CGTCCTGGTAGGCAGAGAAC                           | <i>MAT2</i> Southern blot probe primer<br>PO                |
| <b>B15889</b> | CGTTCTCTGCCTACCAGGAC                           | <i>MAT2</i> internal primer iLP                             |
| <b>B15890</b> | CTCTCCCTCAAACGTCTCG                            | <i>MAT2</i> internal primer iRP                             |
| <b>B11381</b> | TGAGGGAGAAAAGGTTCC                             | <i>MAT2</i> qRT primer qLP                                  |
| <b>B11382</b> | GGAGGAGGCATTGACTTATTC                          | <i>MAT2</i> qRT primer qRP                                  |
| <b>B8097</b>  | CGCCTTCACTGCCATCTTC                            | <i>MFa1</i> qRT primer qLP                                  |
| <b>B8098</b>  | ACAAAGGGTCATGCCACCGG                           | <i>MFa1</i> qRT primer qRP                                  |

|               |                              |                                      |
|---------------|------------------------------|--------------------------------------|
| <b>B9062</b>  | GTTTCGAGACTTTCAATGCCC        | <i>ACT1</i> qRT primer qLP           |
| <b>B9063</b>  | ACCAGAGTCAAGAACGATAC         | <i>ACT1</i> qRT primer qRP           |
| <b>B8517</b>  | CACCCCTTATTTTGCCCTC          | <i>STE12α</i> qRT primer qLP         |
| <b>B8518</b>  | GTTTTCGGGTGGGGTGCCA          | <i>STE12α</i> qRT primer qRP         |
| <b>B11060</b> | TTGTGAACGACCACAACCAC         | <i>ZNF2</i> qRT primer qLP           |
| <b>B11061</b> | TGCCTTGCAAGATCACTTTTT        | <i>ZNF2</i> qRT primer qRP           |
| <b>B1894</b>  | TTTTACGCTTTTTGCAGATTCCGCCAAA | <i>Mfa1</i> northern blot primer NP1 |
| <b>B1895</b>  | GACCACTGTTTCTTTCGTTCT        | <i>Mfa1</i> northern blot primer NP2 |
| <b>B13320</b> | ATGGAAGAAGAAGGTACG           | <i>ACT1</i> northern blot primer NP1 |
| <b>B13321</b> | TTAGAAACACTTTCGGTG           | <i>ACT1</i> northern blot primer NP2 |
